# Supplementary material
Source: publisher site journal article supplement (https://www.dovepress.com/article/416741)
Supplement: Supplementary file 1 [file get_supplementary_file.php]

**Supporting Information**

**
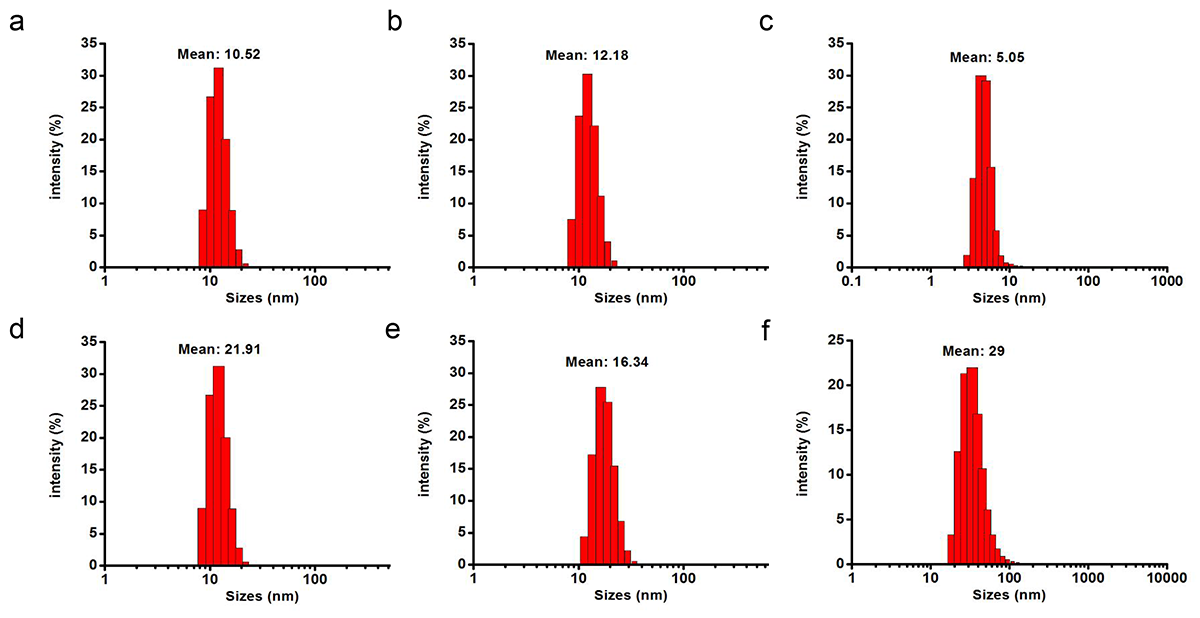
**

**Supplementary Figure S1.** The hydrodynamic diameters of prepared Gd@BSA NPs when changing the BSA feed to 75 mg/mL a), 112.5mg/mL b), 150mg/mL c), and 300mg/mL d) respectively, or at an elevated pH environment (pH = 12 or 13 ) e, f).

**
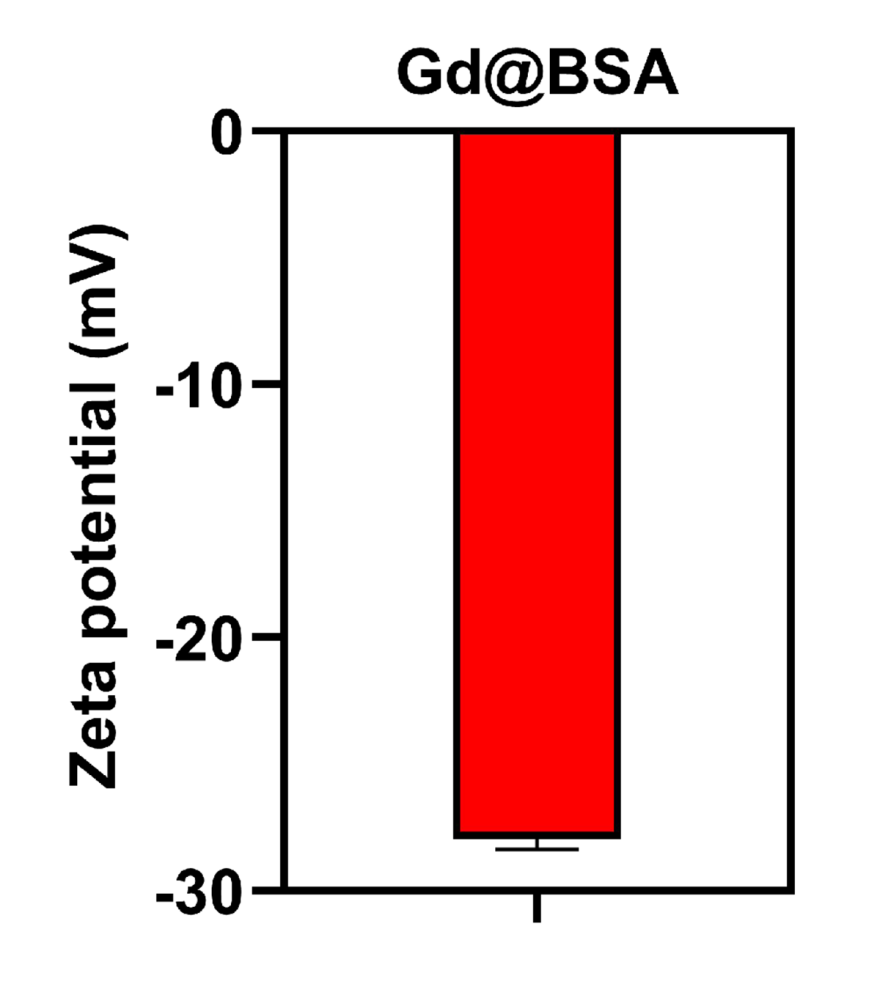
**

**Supplementary Figure S2.** The zeta potential of Gd@BSA NPs.

**Supplementary Figure S3.** XRD pattern of Gd@BSA NPs and JCPDS files of Gd2O3. (* Position of the characteristic peaks).

**
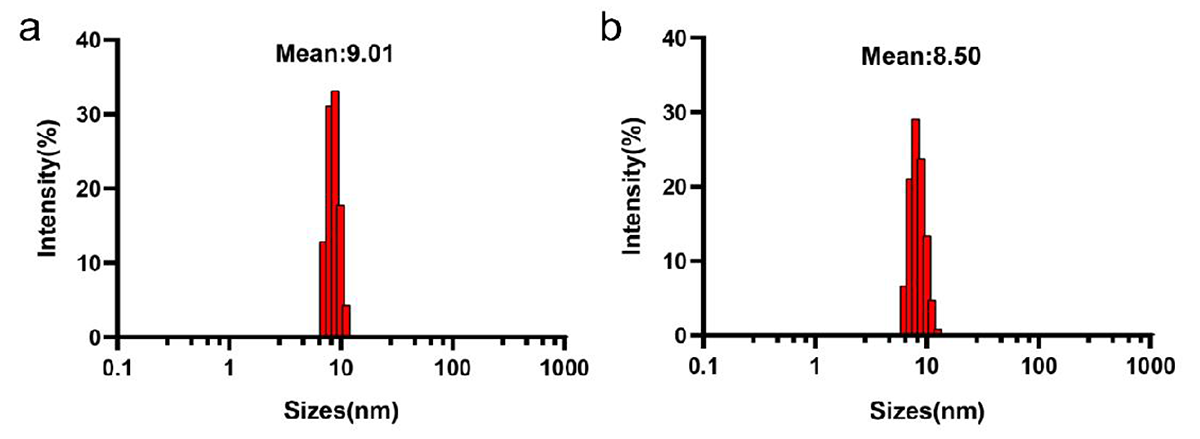
**

**Supplementary Figure S4.** The hydrodynamic diameters of Gd@BSA NPs after incubated in H2O a) , FBS b) .

**
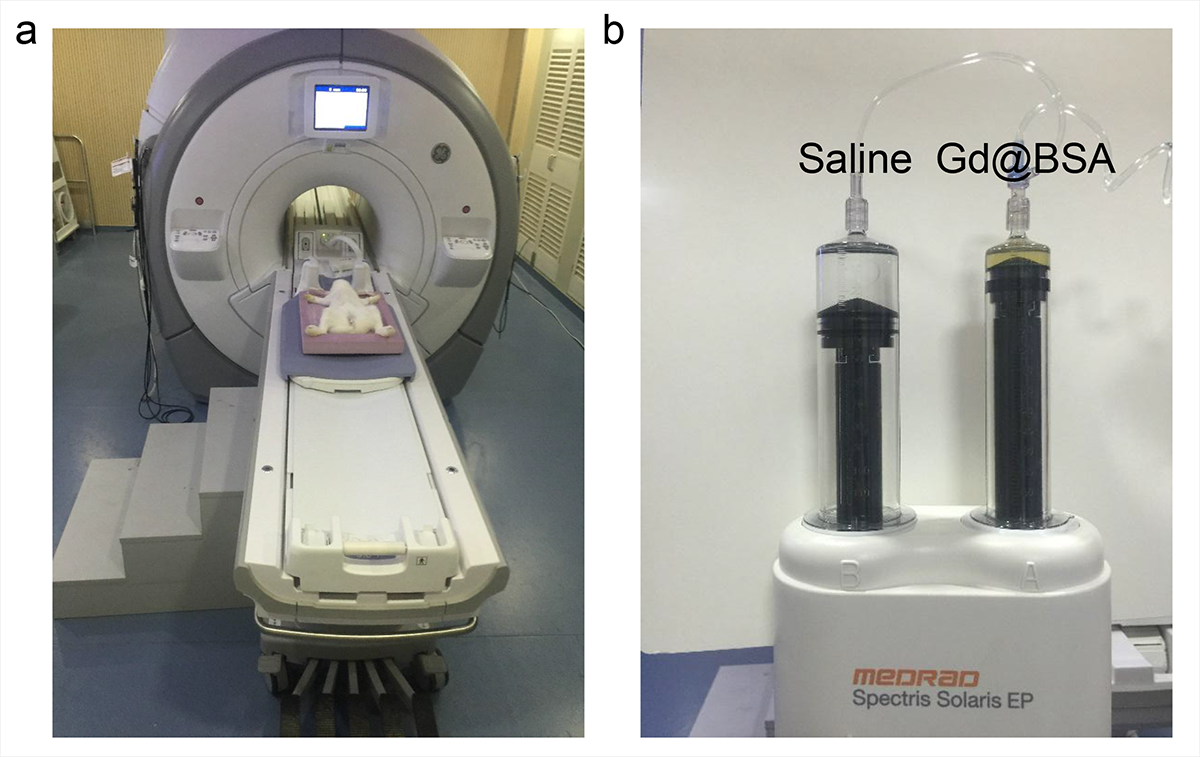
**

**Supplementary Figure S5.** a) Photo of MRA scanning using rabbit models. b) Photo of the double-barrel high pressure syringe.

**
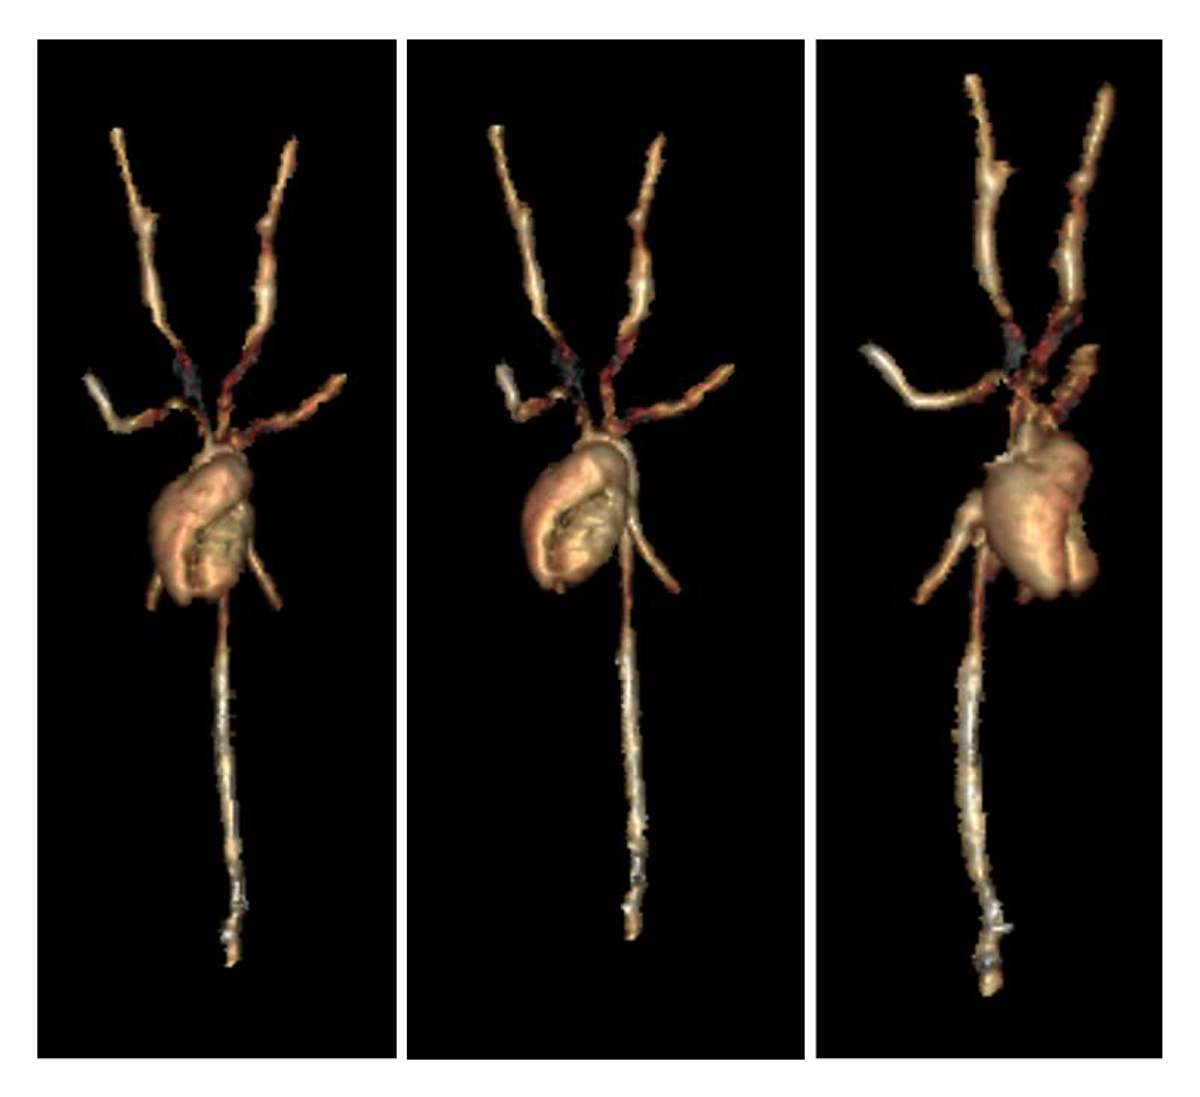
**

**Supplementary Figure S****6.** The 3D-reformed images of cardiac arteries and their branches, abdominal aorta from the rabbits after injected with Gd-DTPA.

**
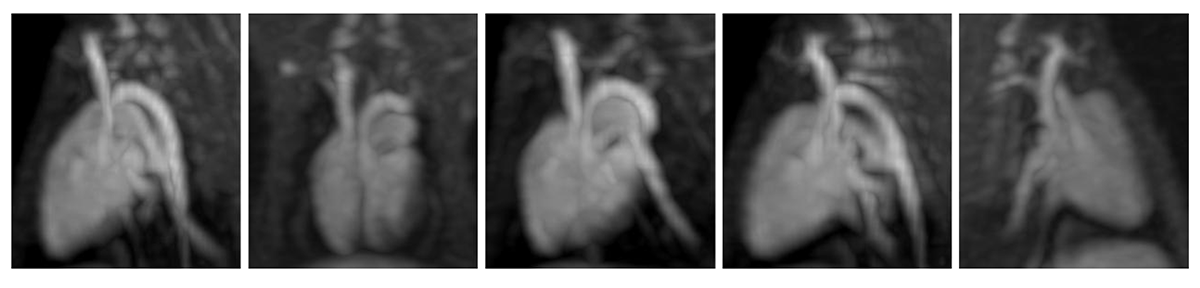
**

**Supplementary Figure S7.** The angiographic images of cardiovascular systems of the rabbits after injected with Magnevist nanoparticles.

**
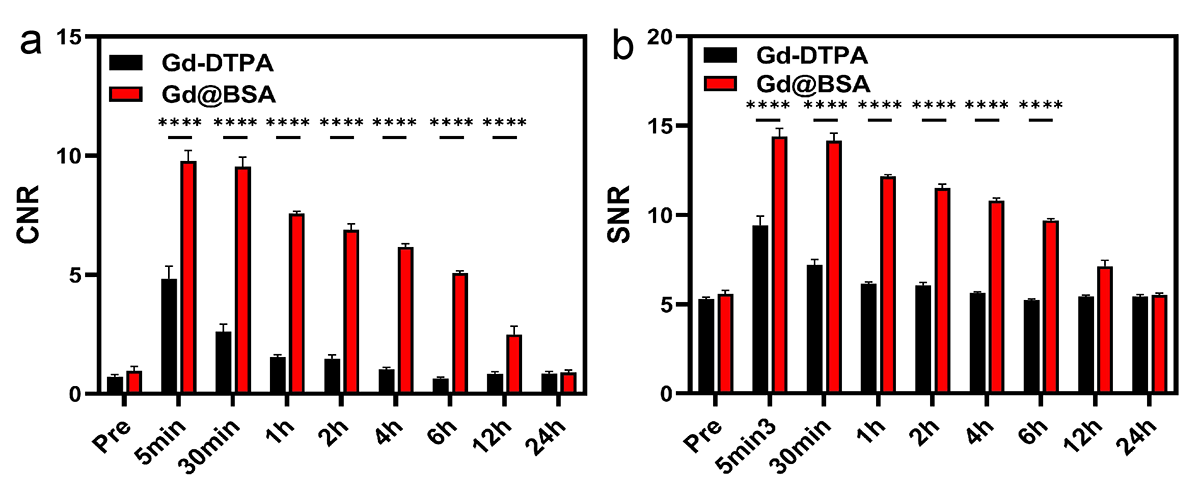
**

**Supplementary Figure S8.** CNR and SNR corresponding to the angiographic images at different times after injection of Gd@BSA NPs. The regions of interest used to calculate CNR and SNR of (a,b) were main cardiac vessels. ****P<0.0001.

**Supplementary Table S1.** Measurement of Gd excretion rates of from the rabbits injected with Gd@BSA.

|  | **1d** | **3d** | **5d** | **7d** |
| --- | --- | --- | --- | --- |
| Feces (%) | 25.70 | 2.74 | 1.01 | 0.94 |
| Urine (%) | 49.35 | 9.50 | 4.40 | 1.09 |

**
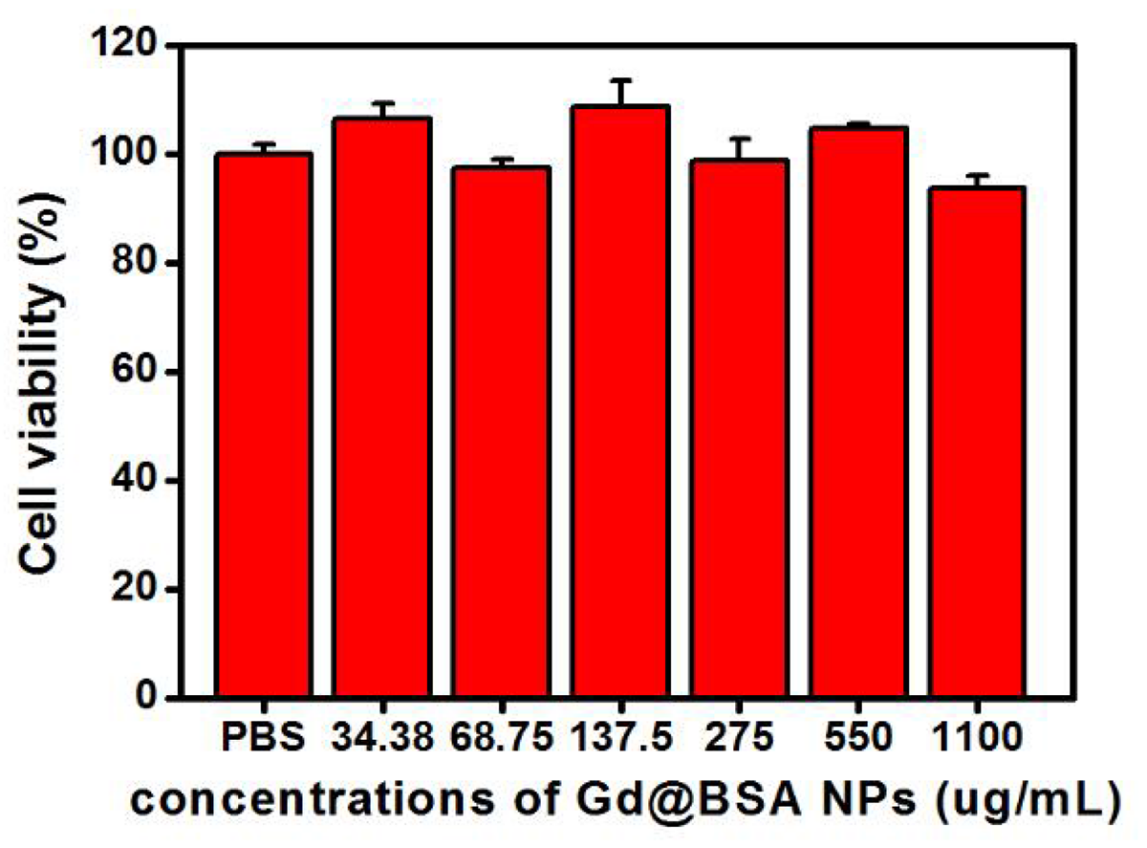
.**

**Supplementary Figure S9.** HeLa cell viability determined by MTT assay after incubation with different concentrations of Gd@BSA NPs (0–1100 µg/mL).

**
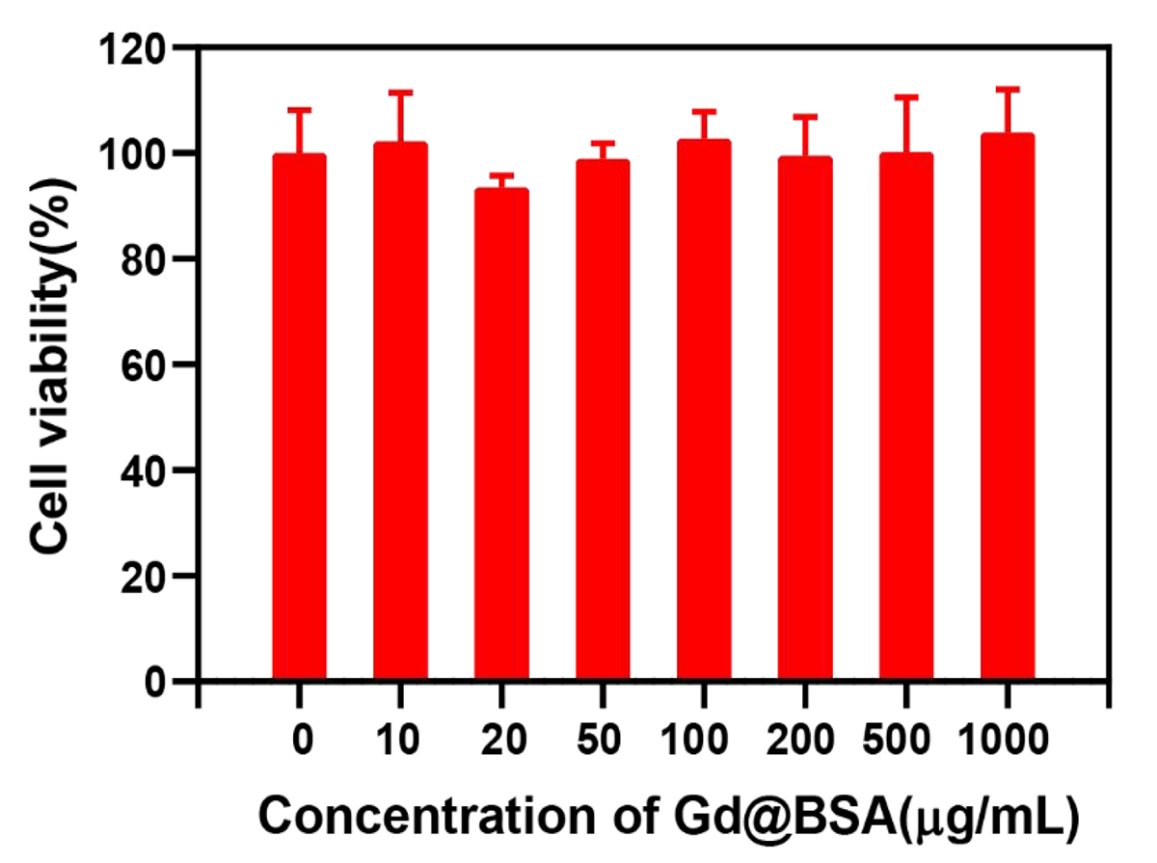
**

**Supplementary Figure S10.** RAW264.7 cells viability via MTT assay after incubation with different concentrations of Gd@BSA NPs (0–1000 µg/mL).

**
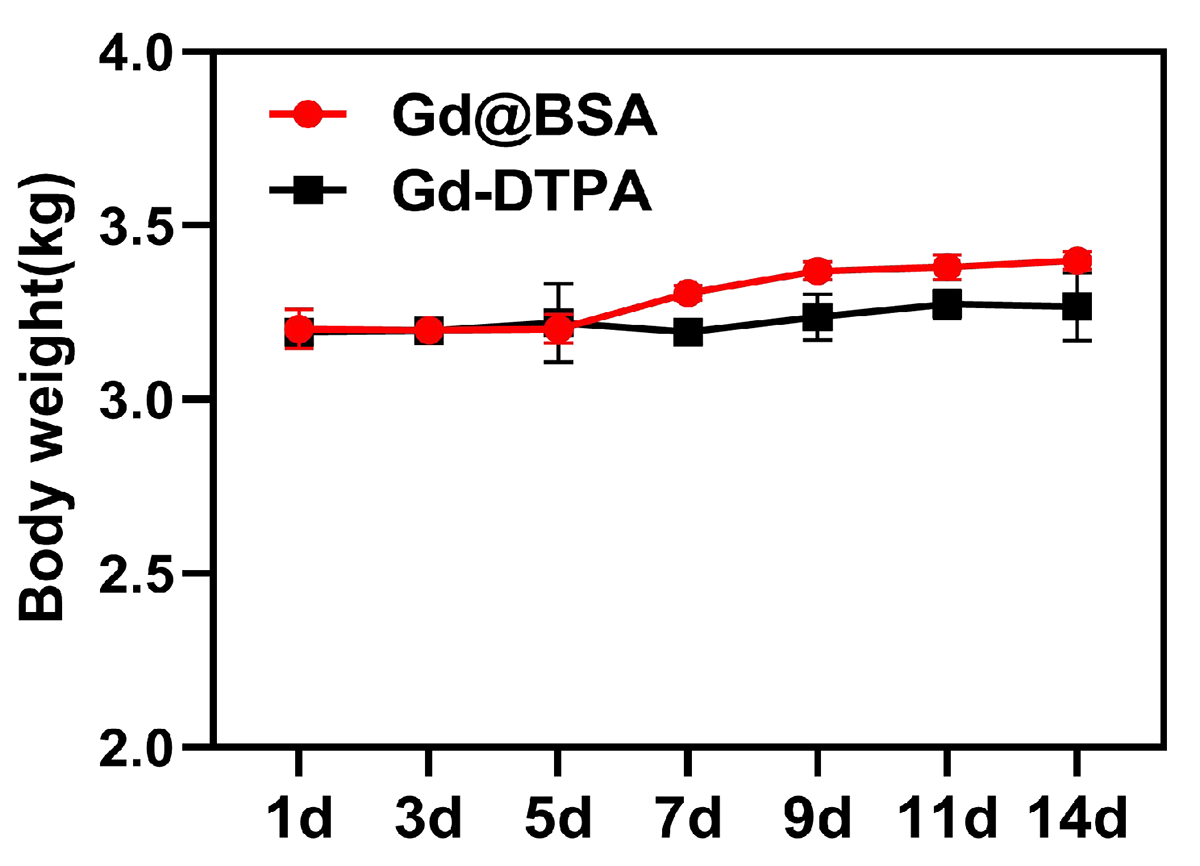
**

**Supplementary Figure S11.** Changes in the rabbit body weights during the 14-day observation period.

**Supplementary Table S2.** Hematology indexes from the rabbits injected with Gd-DTPA during a 14-day observation period (n=3).

|  | **Pre** | **5 min** | **15 min** | **30 min** | **1h** | **2h** | **4h** | **6h** | **1d** | **3d** | **7d** | **14d** |
| --- | --- | --- | --- | --- | --- | --- | --- | --- | --- | --- | --- | --- |
| WBC(109/L) | 5.93 | 5.93 | 6.43 | 1.03 | 1.13 | 1.20 | 2.03 | 1.67 | 6.43 | 3.27 | 3.78 | 5.54 |
| RBC(1012/L) | 4.12 | 4.12 | 4.27 | 3.26 | 1.67 | 2.54 | 2.68 | 2.73 | 5.29 | 2.63 | 2.60 | 1.66 |
| PLT(109/L) | 201.33 | 201.33 | 179.67 | 38.00 | 26.00 | 42.00 | 55.67 | 30.00 | 336.00 | 46.00 | 127.50 | 91.00 |
| HGB(g/L) | 328.67 | 328.67 | 319.33 | 285.25 | 352.00 | 367.67 | 345.67 | 339.00 | 217.67 | 335.67 | 375.50 | 436.20 |
| NE(109/L) | 4.43 | 4.43 | 5.07 | 0.80 | 0.97 | 1.00 | 1.57 | 1.37 | 5.40 | 2.63 | 2.75 | 4.68 |
